# Supplementary material for: Treatment with Docosahexaenoic Acid Improves Epidermal Keratinocyte Differentiation and Ameliorates Inflammation in Human Keratinocytes and Reconstructed Human Epidermis Models
Source: PubMed Central journal article supplement (PMC6749566; doi:10.3390/molecules24173156), 2019-08-30
Supplement: molecules-24-03156-s001.pdf [file molecules-24-03156-s001.pdf]

**Table S1.** Primers for qPCR

| <b>Primer</b>   | <b>Sequences (5'-3')</b>  | <b>Gene Bank ID</b> |
|-----------------|---------------------------|---------------------|
| IL6 F           | ACTCACCTCTTCAGAACGAATTG   | NM_000600.5         |
| IL6 R           | CCATCTTTGGAAGGTTTCAGGTTG  |                     |
| IL-1 $\alpha$ F | ATGGCCAAAGTTCGAGACATG     | NM_000575.4         |
| IL-1 $\alpha$ R | CTACGCCTGGTTTTCCAGTATCTGA |                     |
| TNF $\alpha$ F  | ATGAGCACTGAAAGCATGATCC    | NM_000594.4         |
| TNF $\alpha$ R  | GAGGGCTGATTAGAGAGAGGTC    |                     |
| FLG F           | GCAAGGTCAAGTCCAGGAGA      | NM_00206.1          |
| FLG R           | CCCTCGGTTTCCACTGTCTC      |                     |
| LOR F           | GAGTTGGAGGTGTTTTCCAGGG    | NM_000427.3         |
| LOR R           | GCAGA ACTAGATGCAGCCGGA    |                     |
| IVL F           | TAACCACCCGAGTGTCCAG       | NM_005547.3         |
| IVL R           | ACAGATGAGACGGGCCACCTA     |                     |
| GADPH F         | GAAGGTCGGAGTCAACGGATT     | NM_002046.7         |
| GADPH R         | TGACGGTGCCATGGAATTTG      |                     |

**Table S2.** Formula Composition

| <b>Ingredient</b> | <b>Content (%)</b> |
|-------------------|--------------------|
| Carbomer          | 1%                 |
| Propylene glycol  | 15%                |
| Water             | 100%               |
| DHA               | 0.1%               |

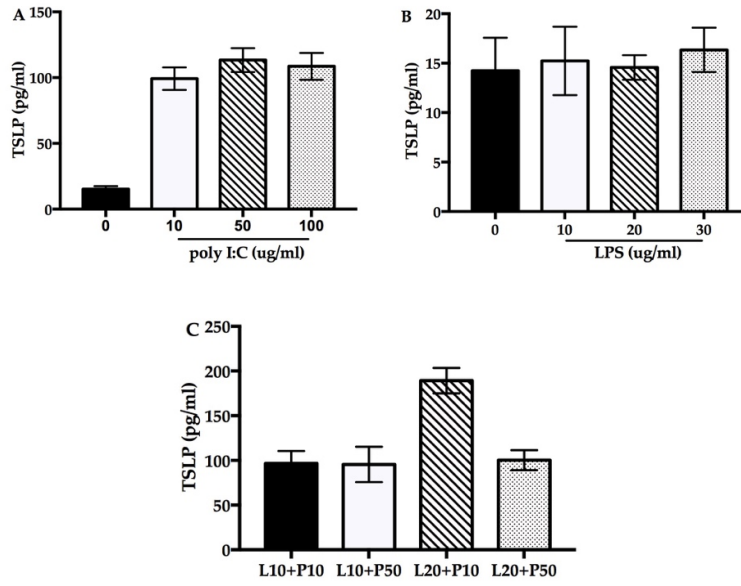

**Figure S1.** Effect of poly I:C, LPS, and a cocktail on the TSLP secretion in NHEK cells. The changes of TSLP were accessed using ELISA. **(A)** Effects of poly I:C on the TSLP secretion. **(B)** Effects of LPS on the TSLP secretion. **(C)** Effects of LPS + poly I:C on the TSLP secretion. Data are expressed as mean  $\pm$  standard deviation (SD). Cocktail, LPS + poly I:C; L, LPS, lipopolysaccharide; P, poly I:C, polyinosinic-polycytidylic acid; TSLP, thymic stromal lymphopoietin.

#### Methods

Regarding LPS and poly I:C, we determined the optimum concentrations for subsequent studies. NHEK cells ( $6 \times 10^3$  cells/well) were seeded in 96-well plates (Nunc, Thermo Fisher Scientific, Waltham, MA, USA) and treated with different concentrations of poly I:C, LPS, and poly I:C + LPS for 24 h according to the results of cells viability. We defined the best concentration of LPS plus poly I:C by measuring the expression of TSLP. The supernatant of NHEK cells were collected from the six-well plates. Thymic stromal lymphopoietin (TSLP) were determined by using ELISA kits (R&D System Inc., Minneapolis, MN, USA). The tests were performed strictly according to the manufacturer's instructions.

#### Results

Finally, we combined 20  $\mu\text{g/ml}$  LPS and 10  $\mu\text{g/ml}$  poly I:C for 24 hours and found that the expression of TSLP in the cocktail was significantly higher than another mixed group.
